# Supplementary material for: Evaluation of the Thermal Processes on Changing the Phenotypic Characteristics of Escherichia coli Strains from Ice Cream Compared to Non-Pasteurized Milk
Source: MDPI journal article supplement (doi:10.3390/fermentation8120730), 2022-12-12
Supplement: s1 [file s1]

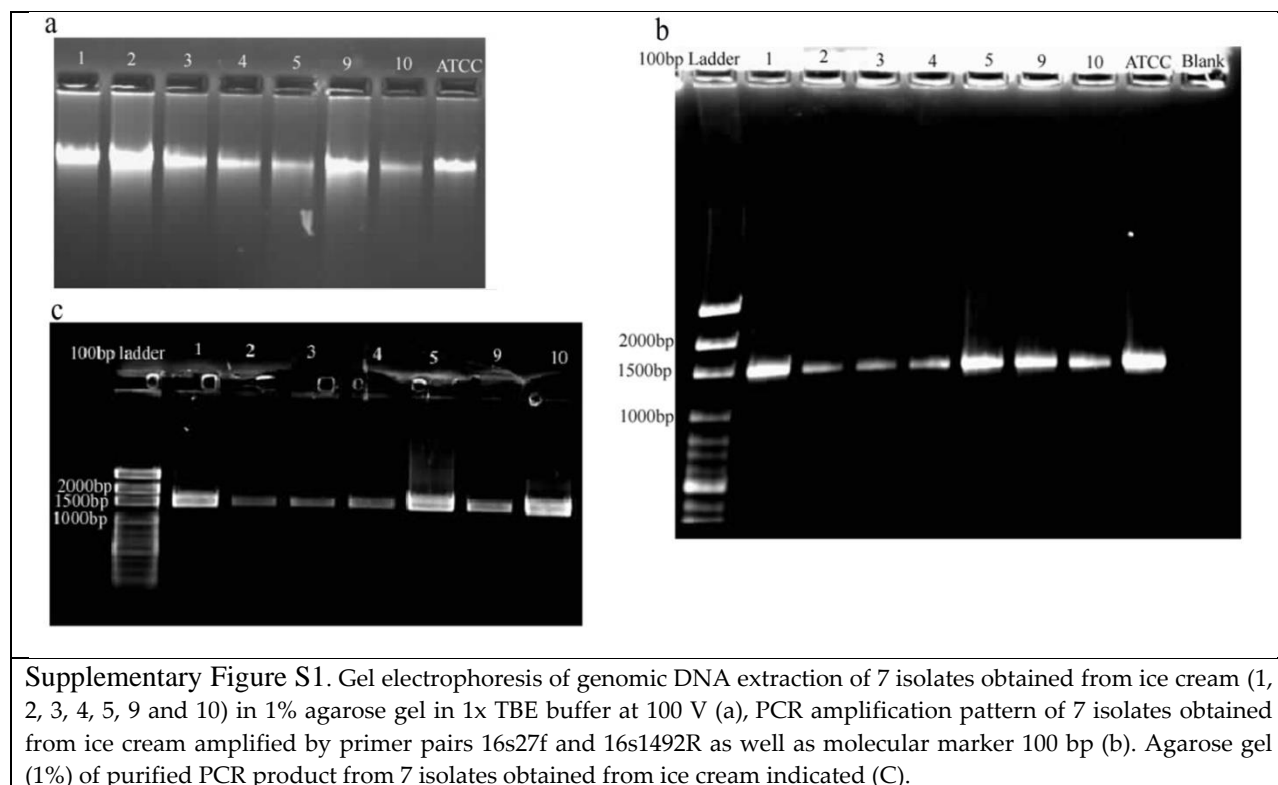

Supplementary Figure S1. Gel electrophoresis of genomic DNA extraction of 7 isolates obtained from ice cream (1, 2, 3, 4, 5, 9 and 10) in 1% agarose gel in 1x TBE buffer at 100 V (a), PCR amplification pattern of 7 isolates obtained from ice cream amplified by primer pairs 16s27f and 16s1492R as well as molecular marker 100 bp (b). Agarose gel (1%) of purified PCR product from 7 isolates obtained from ice cream indicated (C).

|                   |                    |                    |                    |                    |                    |
|-------------------|--------------------|--------------------|--------------------|--------------------|--------------------|
|                   | ..... .....  ..... | ..... .....  ..... | ..... .....  ..... | ..... .....  ..... | ..... .....  ..... |
|                   | 10                 | 20                 | 30                 | 40                 | 50                 |
| <b>gi 5373665</b> | CAGTCGAACG         | GTAACAGGAA         | GCAGCTTGCT         | TCTTTGCTGA         | CGAGTGGCGG         |
| <b>1</b>          | CAGTCGA-CG         | GTAACAGGAA         | GCAGCTTGCT         | GCTTTGCTGA         | CGAGTGGCGG         |
| <b>2</b>          | CAGTCGA-CG         | GTAACAGGAA         | A-AGCTTGCT         | GCTTCGCTGA         | CGAGTGGCGG         |
| <b>3</b>          | CAGTCGA-CG         | GTAACAGGAA         | A-AGCTTGCT         | GCTTCGCTGA         | CGAGTGGCGG         |
| <b>4</b>          | CAGTCGA-CG         | GTAACAGGAA         | C-AGCTTGCT         | GCTTCGCTGA         | CGAGTGGCGG         |
| <b>5</b>          | CAGTCGA-CG         | GTAACAGGAA         | GCAGCTTGCT         | GCTTTGCTGA         | CGAGTGGCGG         |
| <b>9</b>          | CAGTCGA-CG         | GTAACAGGAA         | ACAGCTTGCT         | GCTTCGCTGA         | CGAGTGGCGG         |
| <b>10</b>         | CAGTCGA-CG         | GTAACAGGAA         | AAAGCTTGCT         | GCTTCGCTGA         | CGAGTGGCGG         |

|                   |                    |                    |                    |                    |                    |
|-------------------|--------------------|--------------------|--------------------|--------------------|--------------------|
|                   | ..... .....  ..... | ..... .....  ..... | ..... .....  ..... | ..... .....  ..... | ..... .....  ..... |
|                   | 60                 | 70                 | 80                 | 90                 | 100                |
| <b>gi 5373665</b> | ACGGGTGAGT         | AATGTCTGGG         | AAACTGCCTG         | ATGGAGGGGG         | ATAACTACTG         |
| <b>1</b>          | ACGGGTGAGT         | AATGTCTGGG         | AAACTGCCTG         | ATGGAGGGGG         | ATAACTACTG         |
| <b>2</b>          | ACGGGTGAGT         | AATGTCTGGG         | AAACTGCCTG         | ATGGAGGGGG         | ATAACTACTG         |
| <b>3</b>          | ACGGGTGAGT         | AATGTCTGGG         | AAACTGCCTG         | ATGGAGGGGG         | ATAACTACTG         |
| <b>4</b>          | ACGGGTGAGT         | AATGTCTGGG         | AAACTGCCTG         | ATGGAGGGGG         | ATAACTACTG         |
| <b>5</b>          | ACGGGTGAGT         | AATGTCTGGG         | AAACTGCCTG         | ATGGAGGGGG         | ATAACTACTG         |
| <b>9</b>          | ACGGGTGAGT         | AATGTCTGGG         | AAACTGCCTG         | ATGGAGGGGG         | ATAACTACTG         |
| <b>10</b>         | ACGGGTGAGT         | AATGTCTGGG         | AAACTGCCTG         | ATGGAGGGGG         | ATAACTACTG         |

|                   |                    |                    |                    |                    |                    |
|-------------------|--------------------|--------------------|--------------------|--------------------|--------------------|
|                   | ..... .....  ..... | ..... .....  ..... | ..... .....  ..... | ..... .....  ..... | ..... .....  ..... |
|                   | 110                | 120                | 130                | 140                | 150                |
| <b>gi 5373665</b> | GAAACGGTAG         | CTAATACCGC         | ATAACGTCGC         | AAGACCAAAG         | AGGGGGACCT         |
| <b>1</b>          | GAAACGGTAG         | CTAATACCGC         | ATAACGTCGC         | AAGACCAAAG         | AGGGGGACCT         |
| <b>2</b>          | GAAACGGTAG         | CTAATACCGC         | ATAACGTCGC         | AAGACCAAAG         | AGGGGGACCT         |
| <b>3</b>          | GAAACGGTAG         | CTAATACCGC         | ATAACGTCGC         | AAGACCAAAG         | AGGGGGACCT         |
| <b>4</b>          | GAAACGGTAG         | CTAATACCGC         | ATAACGTCGC         | AAGACCAAAG         | AGGGGGACCT         |
| <b>5</b>          | GAAACGGTAG         | CTAATACCGC         | ATAACGTCGC         | AAGACCAAAG         | AGGGGGACCT         |
| <b>9</b>          | GAAACGGTAG         | CTAATACCGC         | ATAACGTCGC         | AAGACCAAAG         | AGGGGGACCT         |
| <b>10</b>         | GAAACGGTAG         | CTAATACCGC         | ATAACGTCGC         | AAGACCAAAG         | AGGGGGACCT         |

|                   |                    |                    |                    |                    |                    |
|-------------------|--------------------|--------------------|--------------------|--------------------|--------------------|
|                   | ..... .....  ..... | ..... .....  ..... | ..... .....  ..... | ..... .....  ..... | ..... .....  ..... |
|                   | 160                | 170                | 180                | 190                | 200                |
| <b>gi 5373665</b> | TCGGGCCTCT         | TGCCATCGGA         | TGTGCCCAGA         | TGGGATTAGC         | TTGTTGGTGG         |
| <b>1</b>          | TCGGGCCTCT         | TGCCATCGGA         | TGTGCCCAGA         | TGGGATTAGC         | TTGTTGGTGG         |
| <b>2</b>          | TCGGGCCTCT         | TGCCATCGGA         | TGTGCCCAGA         | TGGGATTAGC         | TTGTTGGTGG         |
| <b>3</b>          | TCGGGCCTCT         | TGCCATCGGA         | TGTGCCCAGA         | TGGGATTAGC         | TTGTTGGTGG         |
| <b>4</b>          | TCGGGCCTCT         | TGCCATCGGA         | TGTGCCCAGA         | TGGGATTAGC         | TTGTTGGTGG         |
| <b>5</b>          | TCGGGCCTCT         | TGCCATCGGA         | TGTGCCCAGA         | TGGGATTAGC         | TTGTTGGTGG         |
| <b>9</b>          | TCGGGCCTCT         | TGCCATCGGA         | TGTGCCCAGA         | TGGGATTAGC         | TTGTTGGTGG         |
| <b>10</b>         | TCGGGCCTCT         | TGCCATCGGA         | TGTGCCCAGA         | TGGGATTAGC         | TTGTTGGTGG         |

|                   |                    |                    |                    |                    |                    |
|-------------------|--------------------|--------------------|--------------------|--------------------|--------------------|
|                   | ..... .....  ..... | ..... .....  ..... | ..... .....  ..... | ..... .....  ..... | ..... .....  ..... |
|                   | 210                | 220                | 230                | 240                | 250                |
| <b>gi 5373665</b> | GGTAACGGCT         | CACCTAGGCG         | ACGATCCCTA         | GCTGGTCTGA         | GAGGATGACC         |
| <b>1</b>          | GGTAACGGCT         | CACCTAGGCG         | ACGATCCCTA         | GCTGGTCTGA         | GAGGATGACC         |
| <b>2</b>          | GGTAACGGCT         | CACCTAGGCG         | ACGATCCCTA         | GCTGGTCTGA         | GAGGATGACC         |
| <b>3</b>          | GGTAACGGCT         | CACCTAGGCG         | ACGATCCCTA         | GCTGGTCTGA         | GAGGATGACC         |
| <b>4</b>          | GGTAACGGCT         | CACCTAGGCG         | ACGATCCCTA         | GCTGGTCTGA         | GAGGATGACC         |
| <b>5</b>          | GGTAACGGCT         | CACCTAGGCG         | ACGATCCCTA         | GCTGGTCTGA         | GAGGATGACC         |

9 GGTAACGGCT CACCTAGGCG ACGATCCCTA GCTGGTCTGA GAGGATGACC  
10 GGTAACGGCT CACCTAGGCG ACGATCCCTA GCTGGTCTGA GAGGATGACC

.....|.....| .....|.....| .....|.....| .....|.....| .....|.....|  
260 270 280 290 300  
gi|5373665 AGCCCACTG GAACTGAGAC ACGGTCCAGA CTCCTACGGG AGGCAGCAGT  
1 AGCCCACTG GAACTGAGAC ACGGTCCAGA CTCCTACGGG AGGCAGCAGT  
2 AGCCCACTG GAACTGAGAC ACGGTCCAGA CTCCTACGGG AGGCAGCAGT  
3 AGCCCACTG GAACTGAGAC ACGGTCCAGA CTCCTACGGG AGGCAGCAGT  
4 AGCCCACTG GAACTGAGAC ACGGTCCAGA CTCCTACGGG AGGCAGCAGT  
5 AGCCCACTG GAACTGAGAC ACGGTCCAGA CTCCTACGGG AGGCAGCAGT  
9 AGCCCACTG GAACTGAGAC ACGGTCCAGA CTCCTACGGG AGGCAGCAGT  
10 AGCCCACTG GAACTGAGAC ACGGTCCAGA CTCCTACGGG AGGCAGCAGT

.....|.....| .....|.....| .....|.....| .....|.....| .....|.....|  
310 320 330 340 350  
gi|5373665 GGGGAATATT GCACAATGGG CGCAAGCCTG ATGCAGCCAT GCCGCGTGTA  
1 GGGGAATATT GCACAATGGG CGCAAGCCTG ATGCAGCCAT GCCGCGTGTA  
2 GGGGAATATT GCACAATGGG CGCAAGCCTG ATGCAGCCAT GCCGCGTGTA  
3 GGGGAATATT GCACAATGGG CGCAAGCCTG ATGCAGCCAT GCCGCGTGTA  
4 GGGGAATATT GCACAATGGG CGCAAGCCTG ATGCAGCCAT GCCGCGTGTA  
5 GGGGAATATT GCACAATGGG CGCAAGCCTG ATGCAGCCAT GCCGCGTGTA  
9 GGGGAATATT GCACAATGGG CGCAAGCCTG ATGCAGCCAT GCCGCGTGTA  
10 GGGGAATATT GCACAATGGG CGCAAGCCTG ATGCAGCCAT GCCGCGTGTA

.....|.....| .....|.....| .....|.....| .....|.....| .....|.....|  
360 370 380 390 400  
gi|5373665 TGAAGAAGGC CTTCGGGTTG TAAAGTACTT TCAGCGGGGA GGAAGGGAGT  
1 TGAAGAAGGC CTTCGGGTTG TAAAGTACTT TCAGCGGGGA GGAAGGGAGT  
2 TGAAGAAGGC CTTCGGGTTG TAAAGTACTT TCAGCGGGGA GGAAGGGAGT  
3 TGAAGAAGGC CTTCGGGTTG TAAAGTACTT TCAGCGGGGA GGAAGGGAGT  
4 TGAAGAAGGC CTTCGGGTTG TAAAGTACTT TCAGCGGGGA GGAAGGGAGT  
5 TGAAGAAGGC CTTCGGGTTG TAAAGTACTT TCAGCGGGGA GGAAGGGAGT  
9 TGAAGAAGGC CTTCGGGTTG TAAAGTACTT TCAGCGGGGA GGAAGGGAGT  
10 TGAAGAAGGC CTTCGGGTTG TAAAGTACTT TCAGCGGGGA GGAAGGGAGT

.....|.....| .....|.....| .....|.....| .....|.....| .....|.....|  
410 420 430 440 450  
gi|5373665 AAAGTTAATA CCTTTGCTCA TTGACGTTAC CCGCAGAAGA AGCACCGGCT  
1 AAAGTTAATA CCTTTGCTCA TTGACGTTAC CCGCAGAAGA AGCACCGGCT  
2 AAAGTTAATA CCTTTGCTCA TTGACGTTAC CCGCAGAAGA AGCACCGGCT  
3 AAAGTTAATA CCTTTGCTCA TTGACGTTAC CCGCAGAAGA AGCACCGGCT  
4 AAAGTTAATA CCTTTGCTCA TTGACGTTAC CCGCAGAAGA AGCACCGGCT  
5 AAAGTTAATA CCTTTGCTCA TTGACGTTAC CCGCAGAAGA AGCACCGGCT  
9 AAAGTTAATA CCTTTGCTCA TTGACGTTAC CCGCAGAAGA AGCACCGGCT  
10 AAAGTTAATA CCTTTGCTCA TTGACGTTAC CCGCAGAAGA AGCACCGGCT

.....|.....| .....|.....| .....|.....| .....|.....| .....|.....|  
460 470 480 490 500  
gi|5373665 AACTCCGTGC CAGCAGCCGC GGTAATACGG AGGGTGCAAG CGTTAATCGG  
1 AACTCCGTGC CAGCAGCCGC GGTAATACGG AGGGTGCAAG CGTTAATCGG  
2 AACTCCGTGC CAGCAGCCGC GGTAATACGG AGGGTGCAAG CGTTAATCGG

|           |               |               |               |               |               |
|-----------|---------------|---------------|---------------|---------------|---------------|
| <b>3</b>  | AAC TCC GTG C | CAG CAG CCG C | GGT AAT ACG G | AGG GTG CAA G | CGT TAA TCG G |
| <b>4</b>  | AAC TCC GTG C | CAG CAG CCG C | GGT AAT ACG G | AGG GTG CAA G | CGT TAA TCG G |
| <b>5</b>  | AAC TCC GTG C | CAG CAG CCG C | GGT AAT ACG G | AGG GTG CAA G | CGT TAA TCG G |
| <b>9</b>  | AAC TCC GTG C | CAG CAG CCG C | GGT AAT ACG G | AGG GTG CAA G | CGT TAA TCG G |
| <b>10</b> | AAC TCC GTG C | CAG CAG CCG C | GGT AAT ACG G | AGG GTG CAA G | CGT TAA TCG G |

|                   | ..... ..... ..... ..... ..... ..... ..... ..... ..... ..... ..... ..... |  |
|-------------------|-------------------------------------------------------------------------|--|
|                   | 510520530540550                                                         |  |
| <b>gi 5373665</b> | AATTACTGGG CGTAAAGCGC ACGCAGGCGG TTTGTTAAGT CAGATGTGAA                  |  |
| <b>1</b>          | AATTACTGGG CGTAAAGCGC ACGCAGGCGG TTTGTTAAGT CAGATGTGAA                  |  |
| <b>2</b>          | AATTACTGGG CGTAAAGCGC ACGCAGGCGG TTTGTTAAGT CAGATGTGAA                  |  |
| <b>3</b>          | AATTACTGGG CGTAAAGCGC ACGCAGGCGG TTTGTTAAGT CAGATGTGAA                  |  |
| <b>4</b>          | AATTACTGGG CGTAAAGCGC ACGCAGGCGG TTTGTTAAGT CAGATGTGAA                  |  |
| <b>5</b>          | AATTACTGGG CGTAAAGCGC ACGCAGGCGG TTTGTTAAGT CAGATGTGAA                  |  |
| <b>9</b>          | AATTACTGGG CGTAAAGCGC ACGCAGGCGG TTTGTTAAGT CAGATGTGAA                  |  |
| <b>10</b>         | AATTACTGGG CGTAAAGCGC ACGCAGGCGG TTTGTTAAGT CAGATGTGAA                  |  |

|                   | ..... ..... | ..... ..... | ..... ..... | ..... ..... | ..... ..... |
|-------------------|-------------|-------------|-------------|-------------|-------------|
|                   | 560         | 570         | 580         | 590         | 600         |
| <b>gi 5373665</b> | ATCCCCGGGC  | TCAACCTGGG  | AAGTGCATCT  | GATACTGGCA  | AGCTTGAGTC  |
| <b>1</b>          | ATCCCCGGGC  | TCAACCTGGG  | AAGTGCATCT  | GATACTGGCA  | AGCTTGAGTC  |
| <b>2</b>          | ATCCCCGGGC  | TCAACCTGGG  | AAGTGCATCT  | GATACTGGCA  | AGCTTGAGTC  |
| <b>3</b>          | ATCCCCGGGC  | TCAACCTGGG  | AAGTGCATCT  | GATACTGGCA  | AGCTTGAGTC  |
| <b>4</b>          | ATCCCCGGGC  | TCAACCTGGG  | AAGTGCATCT  | GATACTGGCA  | AGCTTGAGTC  |
| <b>5</b>          | ATCCCCGGGC  | TCAACCTGGG  | AAGTGCATCT  | GATACTGGCA  | AGCTTGAGTC  |
| <b>9</b>          | ATCCCCGGGC  | TCAACCTGGG  | AAGTGCATCT  | GATACTGGCA  | AGCTTGAGTC  |
| <b>10</b>         | ATCCCCGGGC  | TCAACCTGGG  | AAGTGCATCT  | GATACTGGCA  | AGCTTGAGTC  |

|                   | ..... ..... ..... ..... ..... ..... ..... ..... ..... ..... |  |
|-------------------|-------------------------------------------------------------|--|
|                   | 610620630640650                                             |  |
| <b>gi 5373665</b> | TCGTAGAGGG GGGTAGAATT CCAGGTGTAG CGGTGAAATG CGTAGAGATC      |  |
| <b>1</b>          | TCGTAGAGGG GGGTAGAATT CCAGGTGTAG CGGTGAAATG CGTAGAGATC      |  |
| <b>2</b>          | TCGTAGAGGG GGGTAGAATT CCAGGTGTAG CGGTGAAATG CGTAGAGATC      |  |
| <b>3</b>          | TCGTAGAGGG GGGTAGAATT CCAGGTGTAG CGGTGAAATG CGTAGAGATC      |  |
| <b>4</b>          | TCGTAGAGGG GGGTAGAATT CCAGGTGTAG CGGTGAAATG CGTAGAGATC      |  |
| <b>5</b>          | TCGTAGAGGG GGGTAGAATT CCAGGTGTAG CGGTGAAATG CGTAGAGATC      |  |
| <b>9</b>          | TCGTAGAGGG GGGTAGAATT CCAGGTGTAG CGGTGAAATG CGTAGAGATC      |  |
| <b>10</b>         | TCGTAGAGGG GGGTAGAATT CCAGGTGTAG CGGTGAAATG CGTAGAGATC      |  |

|                   | ..... .....  ..... | ..... .....  ..... | ..... .....  ..... | ..... .....  ..... | ..... .....  ..... |
|-------------------|--------------------|--------------------|--------------------|--------------------|--------------------|
|                   | 660                | 670                | 680                | 690                | 700                |
| <b>gi 5373665</b> | TGGAGGAATA         | CCGGTGGCGA         | AGGCGGCCCC         | CTGGACGAAG         | ACTGACGCTC         |
| <b>1</b>          | TGGAGGAATA         | CCGGTGGCGA         | AGGCGGCCCC         | CTGGACGAAG         | ACTGACGCTC         |
| <b>2</b>          | TGGAGGAATA         | CCGGTGGCGA         | AGGCGGCCCC         | CTGGACGAAG         | ACTGACGCTC         |
| <b>3</b>          | TGGAGGAATA         | CCGGTGGCGA         | AGGCGGCCCC         | CTGGACGAAG         | ACTGACGCTC         |
| <b>4</b>          | TGGAGGAATA         | CCGGTGGCGA         | AGGCGGCCCC         | CTGGACGAAG         | ACTGACGCTC         |
| <b>5</b>          | TGGAGGAATA         | CCGGTGGCGA         | AGGCGGCCCC         | CTGGACGAAG         | ACTGACGCTC         |
| <b>9</b>          | TGGAGGAATA         | CCGGTGGCGA         | AGGCGGCCCC         | CTGGACGAAG         | ACTGACGCTC         |
| <b>10</b>         | TGGAGGAATA         | CCGGTGGCGA         | AGGCGGCCCC         | CTGGACGAAG         | ACTGACGCTC         |

gi|5373665 AGGTGCGAAA GCGTGGGGAG CAAACAGGAT TAGATACCCT GGTAGTCCAC  
1 AGGTGCGAAA GCGTGGGGAG CAAACAGGAT TAGATACCCT GGTAGTCCAC  
2 AGGTGCGAAA GCGTGGGGAG CAAACAGGAT TAGATACCCT GGTAGTCCAC  
3 AGGTGCGAAA GCGTGGGGAG CAAACAGGAT TAGATACCCT GGTAGTCCAC  
4 AGGTGCGAAA GCGTGGGGAG CAAACAGGAT TAGATACCCT GGTAGTCCAC  
5 AGGTGCGAAA GCGTGGGGAG CAAACAGGAT TAGATACCCT GGTAGTCCAC  
9 AGGTGCGAAA GCGTGGGGAG CAAACAGGAT TAGATACCCT GGTAGTCCAC  
10 AGGTGCGAAA GCGTGGGGAG CAAACAGGAT TAGATACCCT GGTAGTCCAC

....|....| ....|....| ....|....| ....|....| ....|....|  
760 770 780 790 800

gi|5373665 GCCGTAAACG ATGTCGACTT GGAGGTTGTG CCCTTGAGGC GTGGCTTCCG  
1 GCCGTAAACG ATGTCGACTT GGAGGTTGTG CCCTTGAGGC GTGGCTTCCG  
2 GCCGTAAACG ATGTCGACTT GGAGGTTGTG CCCTTGAGGC GTGGCTTCCG  
3 GCCGTAAACG ATGTCGACTT GGAGGTTGTG CCCTTGAGGC GTGGCTTCCG  
4 GCCGTAAACG ATGTCGACTT GGAGGTTGTG CCCTTGAGGC GTGGCTTCCG  
5 GCCGTAAACG ATGTCGACTT GGAGGTTGTG CCCTTGAGGC GTGGCTTCCG  
9 GCCGTAAACG ATGTCGACTT GGAGGTTGTG CCCTTGAGGC GTGGCTTCCG  
10 GCCGTAAACG ATGTCGACTT GGAGGTTGTG CCCTTGAGGC GTGGCTTCCG

....|....| ....|....| ....|....| ....|....| ....|....|  
810 820 830 840 850

gi|5373665 GAGCTAACGC GTTAAGTCGA CCGCCTGGGG AGTACGGCCG CAAGGTTAAA  
1 GAGCTAACGC GTTAAGTCGA CCGCCTGGGG AGTACGGCCG CAAGGTTAAA  
2 GAGCTAACGC GTTAAGTCGA CCGCCTGGGG AGTACGGCCG CAAGGTTAAA  
3 GAGCTAACGC GTTAAGTCGA CCGCCTGGGG AGTACGGCCG CAAGGTTAAA  
4 GAGCTAACGC GTTAAGTCGA CCGCCTGGGG AGTACGGCCG CAAGGTTAAA  
5 GAGCTAACGC GTTAAGTCGA CCGCCTGGGG AGTACGGCCG CAAGGTTAAA  
9 GAGCTAACGC GTTAAGTCGA CCGCCTGGGG AGTACGGCCG CAAGGTTAAA  
10 GAGCTAACGC GTTAAGTCGA CCGCCTGGGG AGTACGGCCG CAAGGTTAAA

....|....| ....|....| ....|....| ....|....| ....|....|  
860 870 880 890 900

gi|5373665 ACTCAAATGA ATTGACGGGG GCCCGCACAA GCGGTGGAGC ATGTGGTTTA  
1 ACTCAAATGA ATTGACGGGG GCCCGCACAA GCGGTGGAGC ATGTGGTTTA  
2 ACTCAAATGA ATTGACGGGG GCCCGCACAA GCGGTGGAGC ATGTGGTTTA  
3 ACTCAAATGA ATTGACGGGG GCCCGCACAA GCGGTGGAGC ATGTGGTTTA  
4 ACTCAAATGA ATTGACGGGG GCCCGCACAA GCGGTGGAGC ATGTGGTTTA  
5 ACTCAAATGA ATTGACGGGG GCCCGCACAA GCGGTGGAGC ATGTGGTTTA  
9 ACTCAAATGA ATTGACGGGG GCCCGCACAA GCGGTGGAGC ATGTGGTTTA  
10 ACTCAAATGA ATTGACGGGG GCCCGCACAA GCGGTGGAGC ATGTGGTTTA

....|....| ....|....| ....|....| ....|....| ....|....|  
910 920 930 940 950

gi|5373665 ATTCGATGCA ACGCGAAGAA CCTTACCTGG TCTTGACATC CACGGAAGTT  
1 ATTCGATGCA ACGCGAAGAA CCTTACCTGG TCTTGACATC CACGGAAGTT  
2 ATTCGATGCA ACGCGAAGAA CCTTACCTGG TCTTGACATC CACGGAAGTT  
3 ATTCGATGCA ACGCGAAGAA CCTTACCTGG TCTTGACATC CACGGAAGTT  
4 ATTCGATGCA ACGCGAAGAA CCTTACCTGG TCTTGACATC CACGGAAGTT  
5 ATTCGATGCA ACGCGAAGAA CCTTACCTGG TCTTGACATC CACGGAAGTT  
9 ATTCGATGCA ACGCGAAGAA CCTTACCTGG TCTTGACATC CACGGAAGTT  
10 ATTCGATGCA ACGCGAAGAA CCTTACCTGG TCTTGACATC CACGGAAGTT

|            |                    |                    |                    |                    |                    |
|------------|--------------------|--------------------|--------------------|--------------------|--------------------|
|            | ..... .....  ..... | ..... .....  ..... | ..... .....  ..... | ..... .....  ..... | ..... .....  ..... |
|            | 960                | 970                | 980                | 990                | 1000               |
| gi 5373665 | TTCAGAGATG         | AGAATGTGCC         | TTCGGGAACC         | GTGAGACAGG         | TGCTGCATGG         |
| 1          | TTCAGAGATG         | AGAATGTGCC         | TTCGGGAACC         | GTGAGACAGG         | TGCTGCATGG         |
| 2          | TTCAGAGATG         | AGAATGTGCC         | TTCGGGAACC         | GTGAGACAGG         | TGCTGCATGG         |
| 3          | TTCAGAGATG         | AGAATGTGCC         | TTCGGGAACC         | GTGAGACAGG         | TGCTGCATGG         |
| 4          | TTCAGAGATG         | AGAATGTGCC         | TTCGGGAACC         | GTGAGACAGG         | TGCTGCATGG         |
| 5          | TTCAGAGATG         | AGAATGTGCC         | TTCGGGAACC         | GTGAGACAGG         | TGCTGCATGG         |
| 9          | TTCAGAGATG         | AAAATGTGCC         | TTCGGGAACC         | GTGAGACAGG         | TGCTGCATGG         |
| 10         | TTCAGAGATG         | AAAATGTGCC         | TTCGGGAACC         | GTGAGACAGG         | TGCTGCATGG         |

Supplementary Figure S2. Alignment: 16S Aligned Seqs. of *E. coli* strains obtained from ice cream (1,2,3,4,5,9, 10) in comparison with *E.coli* (gi|537366568|gb| KF574803.1| *Escherichia coli* strain CRTY15 16S ribosomal RNA gene, partial sequence)from NCBI.fas
